# Supplementary material for: Power-free, digital and programmable dispensing of picoliter droplets using a Digit Chip
Source: Royal Society of Chemistry journal article supplement (doi:10.1039/c7lc00199a), 2017-01-01
Supplement: c7lc00199a1.pdf [file c7lc00199a1.pdf]

*Supplementary Information for:*

## **Power-free, digital and programmable dispensing of ultra-small droplets using a Digit Chip**

A. Mephram, J. D. Besant, A. W. Weinstein, I. B. Burgess, E. H. Sargent, S. O. Kelley

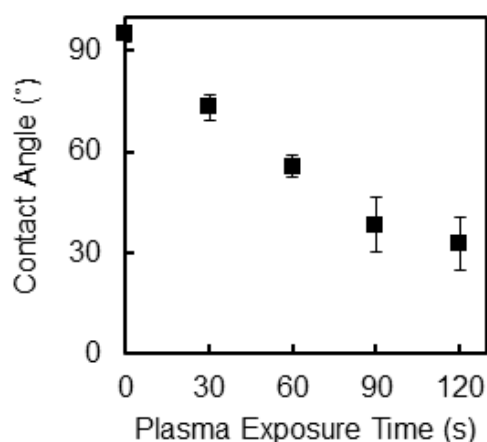

**Fig. S1** The critical advancing contact angle of PBS on PDMS as a function of oxygen plasma exposure time. Error bars represent standard error.

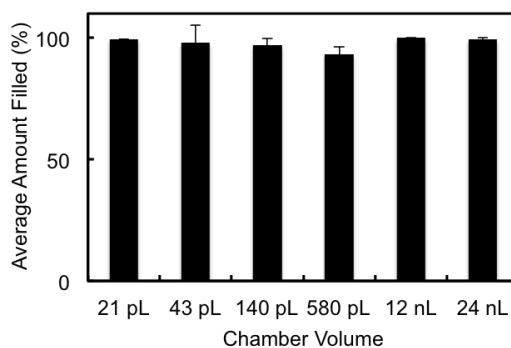

**Fig. S2** Accuracy of filling as a function of chamber size.

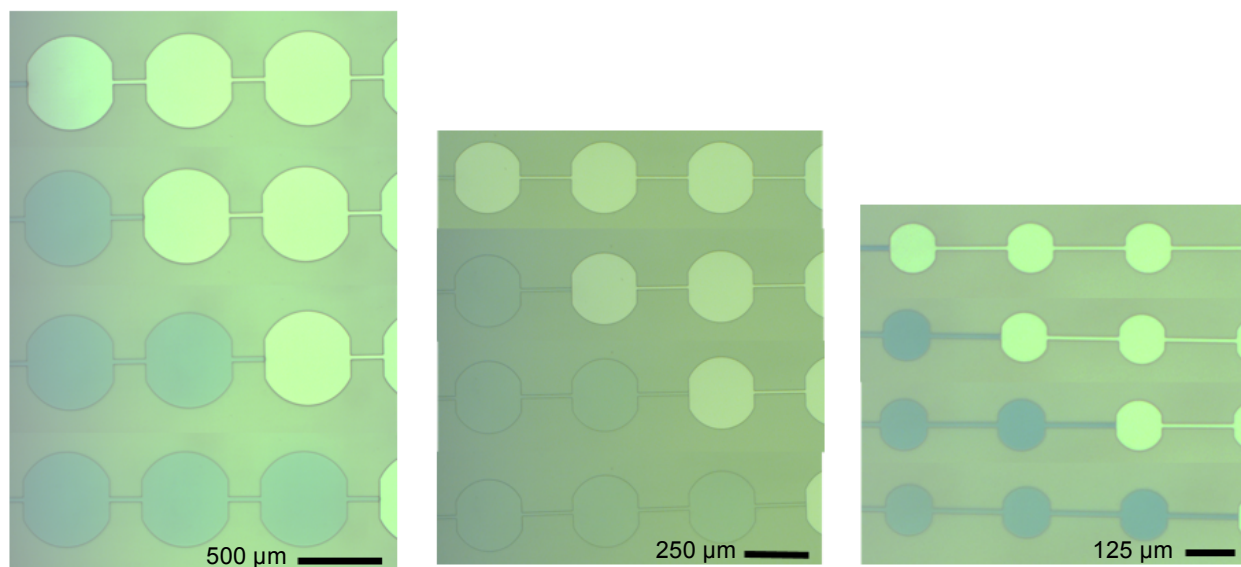

**Fig. S3** A replication of Figure 2F-H performed using button presses rather than using a hydraulic pump, showing the same ability to reliably meter discrete quantities of liquid.
